# Supplementary material for: An anatomy of the projected North Atlantic warming hole in CMIP5 models
Source: Springer Nature journal article supplement (doi:10.1007/s00382-017-3793-8), 2017-07-21

HadGEM3-GC2 WH region 0->316.77m (11 year smoothed) (anom wrt 1850-2000)

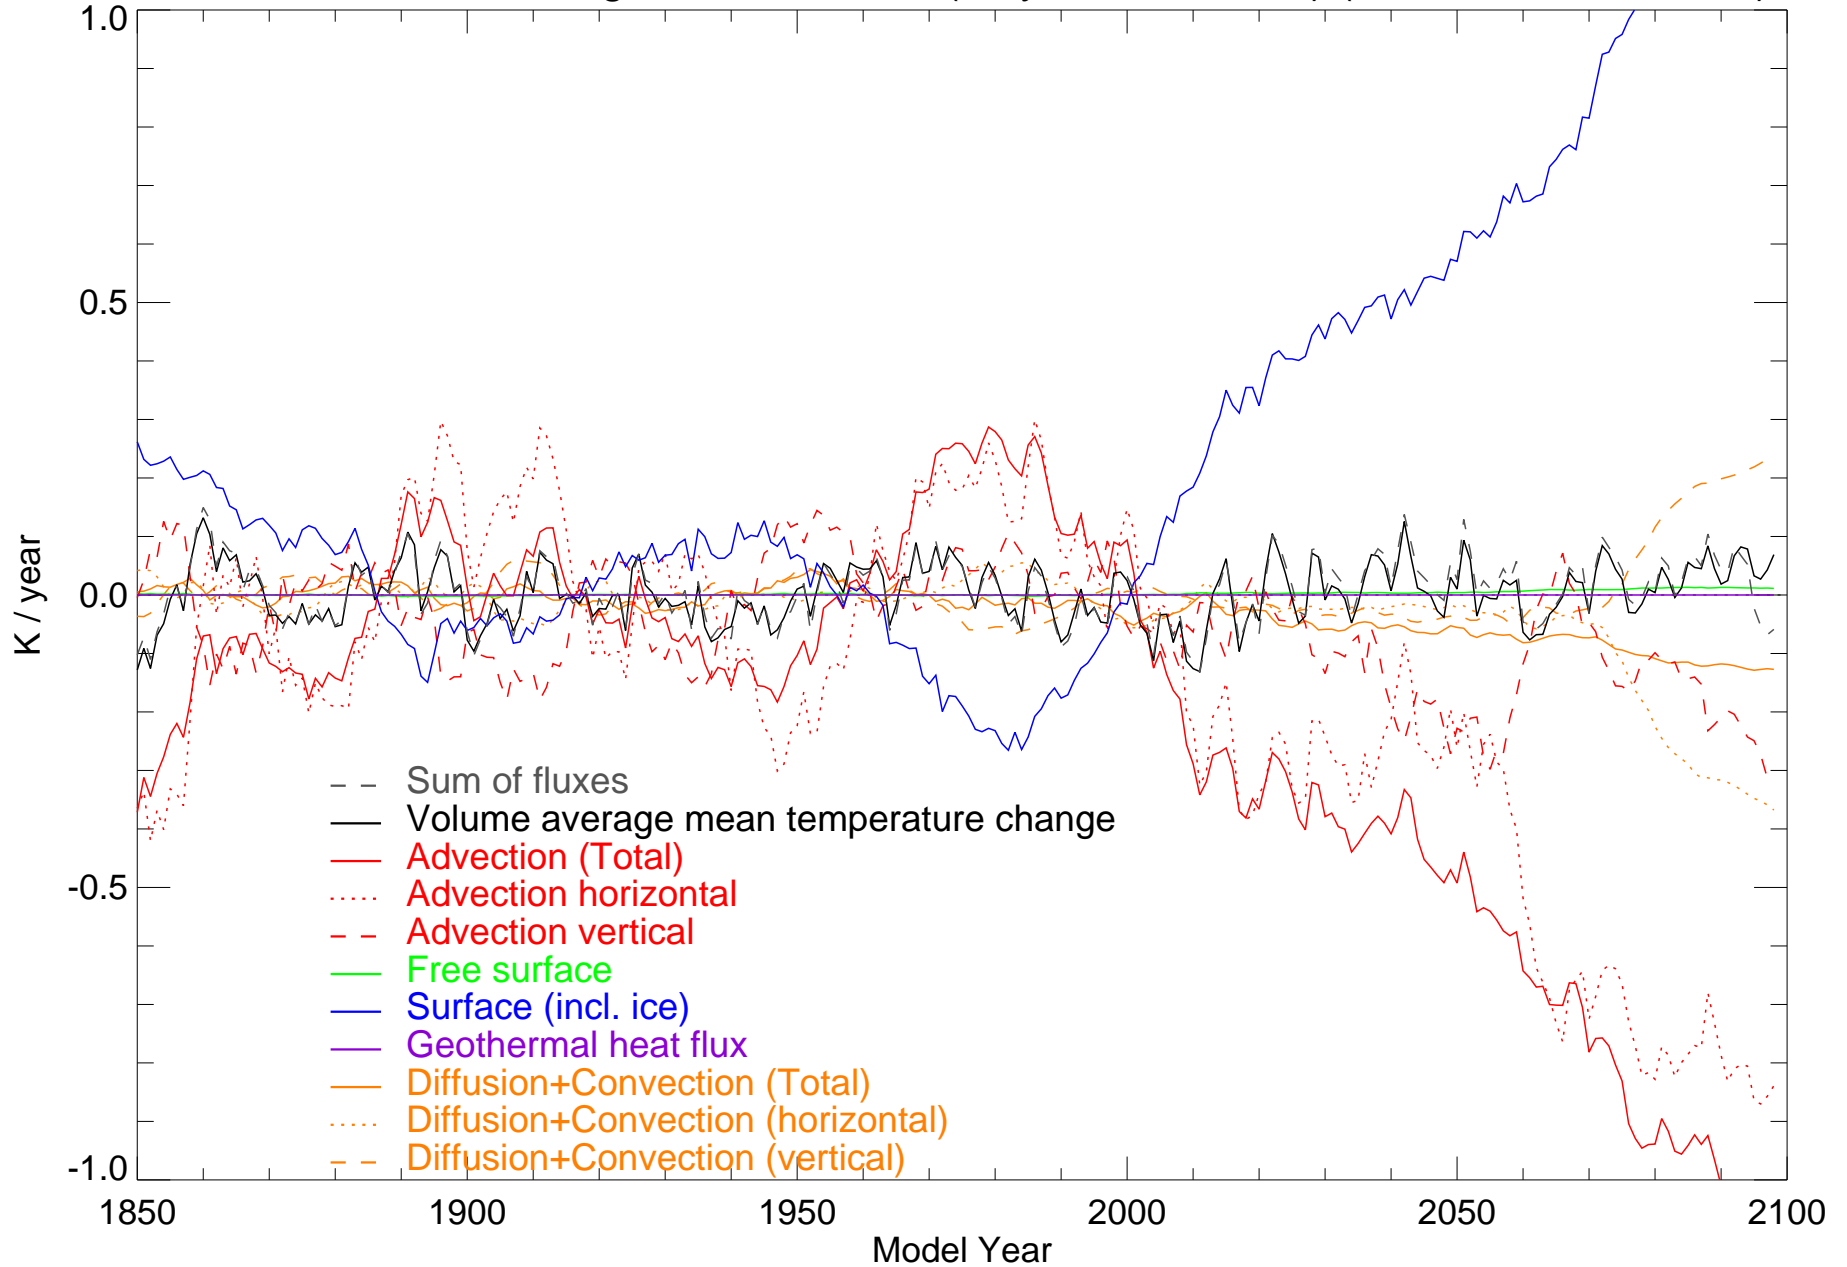

HadGEM3-GC2 WH region 0->535.991m (11 year smoothed) (anom wrt 1850-2000)

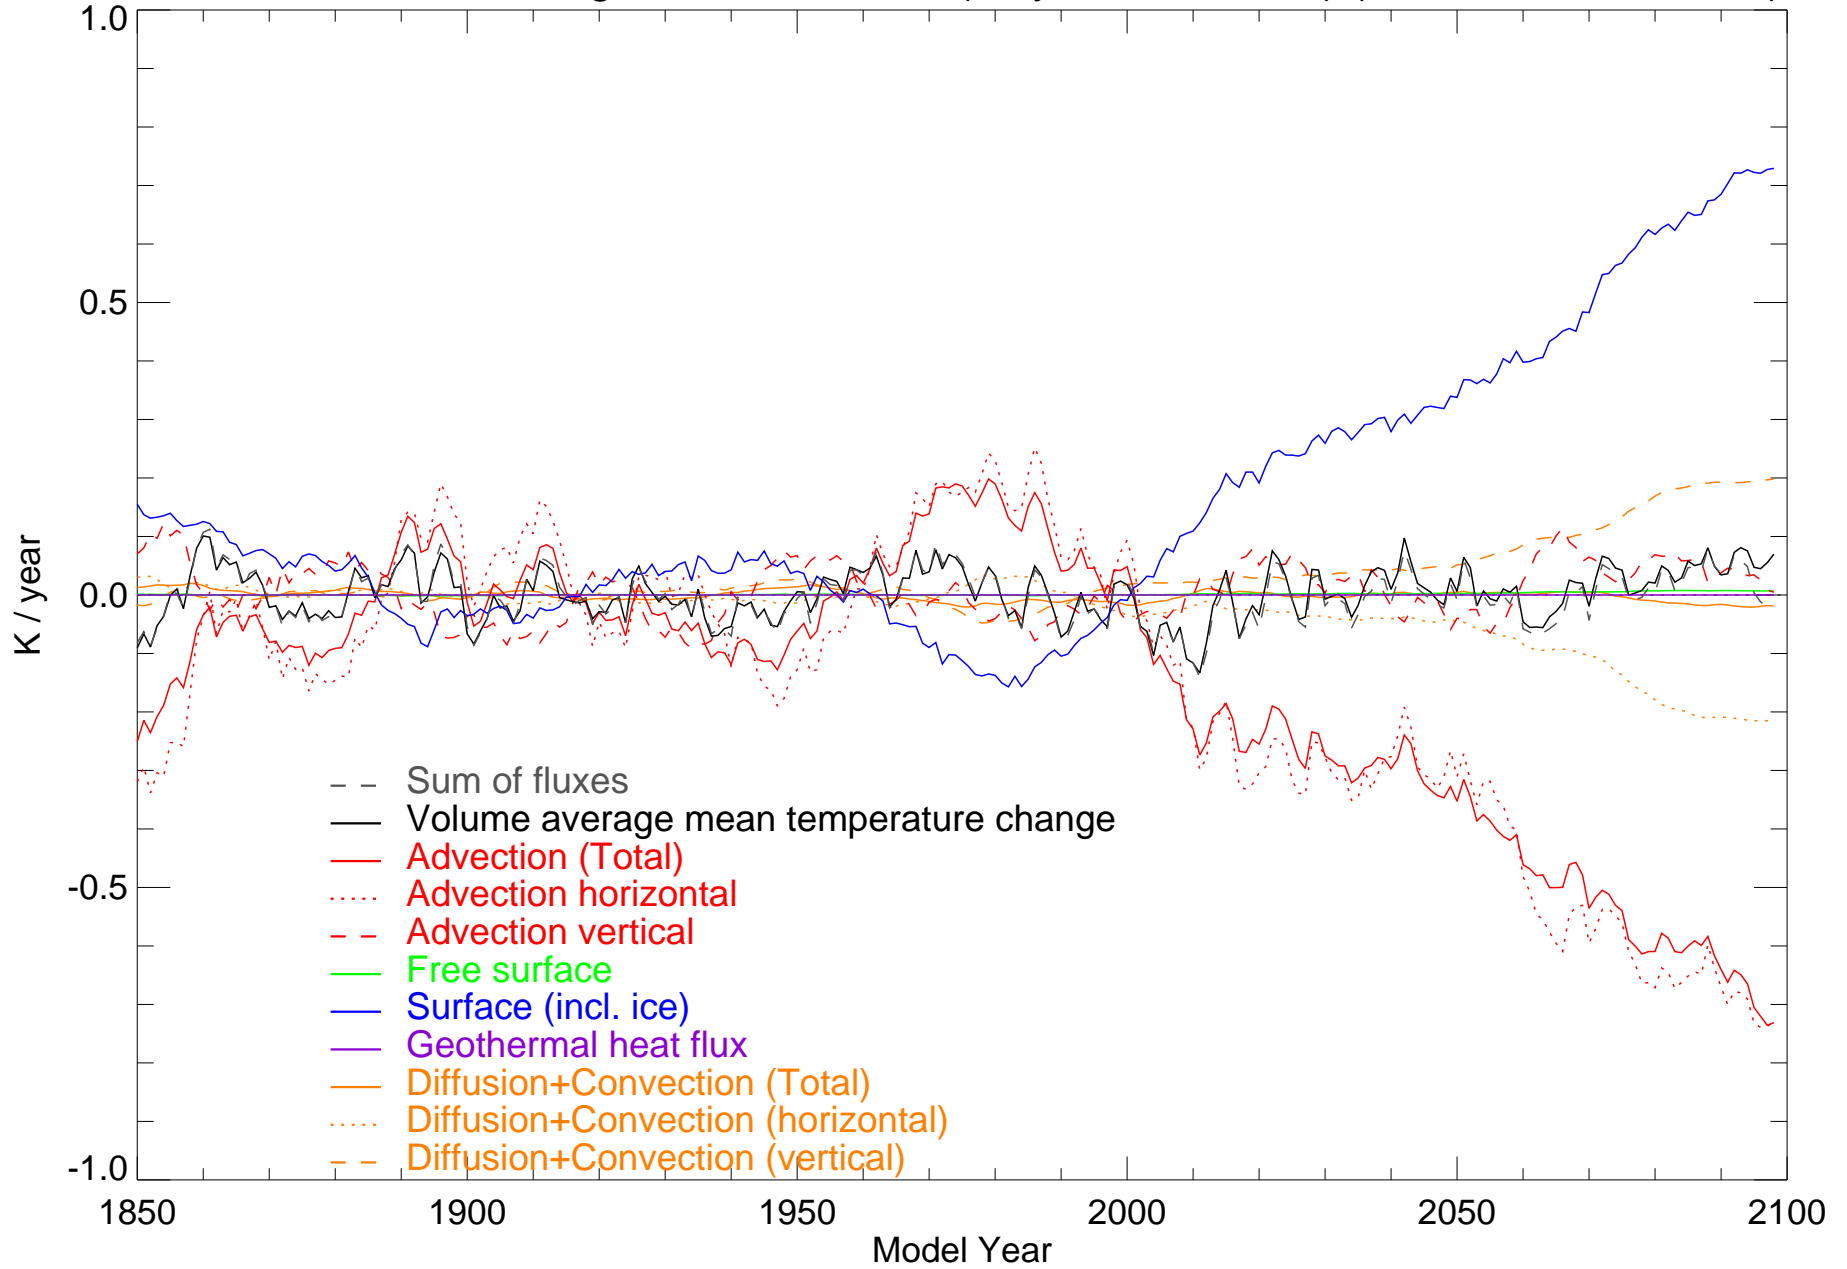

Supplement: 382_2017_3793_MOESM2_ESM.pdf [file 382_2017_3793_MOESM2_ESM.pdf]
